# 1 **Narrow equilibrium window for complex coacervation of** 2 **tau and RNA under cellular conditions**

3  
4 Yanxian Lin<sup>1\*</sup>, James McCarty<sup>2\*</sup>, Jennifer N. Rauch<sup>3,4</sup>, Kris T. Delaney<sup>5</sup>, Kenneth S. Kosik<sup>3,4</sup>,  
5 Glenn H. Fredrickson<sup>5,6</sup>, Joan-Emma Shea<sup>2,7</sup>, Songi Han<sup>2,6†</sup>

6  
7 \* equal contributions

8 † corresponding author

- 9
- 10 1. Biomolecular Science and Engineering, University of California Santa Barbara, Santa
  - 11 Barbara, CA 93106, USA
  - 12 2. Department of Chemistry and Biochemistry, University of California Santa Barbara,
  - 13 Santa Barbara, CA, 93106, USA
  - 14 3. Molecular, Cellular and Developmental Biology, University of California Santa Barbara,
  - 15 Santa Barbara, CA 93106, USA
  - 16 4. Neuroscience Research Institute, University of California Santa Barbara, Santa Barbara,
  - 17 CA 93106, USA
  - 18 5. Materials Research Laboratory, University of California Santa Barbara, Santa Barbara,
  - 19 CA 93106, USA
  - 20 6. Department of Chemical Engineering, University of California Santa Barbara, Santa
  - 21 Barbara, CA 93106, USA
  - 22 7. Department of Physics, University of California Santa Barbara, Santa Barbara, CA
  - 23 93106, USA
- 24  
25  
26  
27  
28  
29  
30  
31  
32  
33

## 34 **Abstract**

35 The conditions that lead to the liquid-liquid phase separation (LLPS) of the tau protein, a  
36 microtubule associated protein whose pathological aggregation has been implicated in  
37 neurodegenerative disorders, are not well understood. Establishing a phase diagram that  
38 delineates the boundaries of phase co-existence is key to understanding its LLPS. Using a  
39 combination of EPR, turbidity measurements, and microscopy, we show that tau and RNA form  
40 complex coacervates with lower critical solution temperature (LCST) behavior. The coacervates  
41 are reversible, and the biopolymers can be driven to the supernatant phase or coacervate phase by  
42 varying the experimental conditions (temperature, salt concentration, tau:RNA charge ratio, total  
43 polymer concentration and osmotic stress). Furthermore, the coacervates can be driven to a  
44 fibrillar state through the addition of heparin. The equilibrium phase diagram of the tau/RNA  
45 complex coacervate system can be described by a Flory-Huggins model, augmented by an  
46 approximate Voorn Overbeek electrostatic term (FH-VO), after fitting the experimental data to  
47 an empirical Flory interaction parameter divided into an entropic and enthalpic term. However, a  
48 more advanced model in which tau and RNA are treated as discrete bead-spring chains with a  
49 temperature-dependent excluded volume interaction and electrostatic interactions between  
50 charged residues, investigated through field theoretic simulations (FTS), provided direct and  
51 unique insight into the thermodynamic driving forces of tau/RNA complexation. FTS  
52 corroborated the experimental finding that the complex coacervation of tau and RNA is has an  
53 entropy-driven contribution, with a transition temperature around the physiological temperature  
54 of 37 °C and salt concentrations around 100-150 mM. Together, experiment and simulation show  
55 that LLPS of tau can occur under physiological cellular conditions, but has a narrow equilibrium  
56 window over experimentally tunable parameters including temperature, salt and tau

57 concentrations. Guided by our phase diagram, we show that tau can be driven towards LLPS  
58 under *live* cell coculturing conditions with rationally chosen experimental parameters.

59

## 60 **Introduction**

61 Protein liquid-liquid phase separation (LLPS) is a process in which proteins assemble and  
62 partition into a protein-dense phase and a protein-dilute phase. The proteins in the dense phase  
63 form droplets, and retain liquid-like mobility, as shown by NMR measurements [1,2]. The  
64 process of LLPS *in vitro* has been observed for decades [3–8], but the field has recently been  
65 invigorated by the realization that LLPS also occurs *in vivo*, suggesting a possible physiological  
66 role for these assemblies[4,9,10]. The overwhelming majority of proteins observed to undergo  
67 LLPS are intrinsically disordered proteins (IDPs) [11], and much of the research thus far has  
68 focused on ALS-related IDPs, including FUS [9,12–14], hnRNPA2B1 and hnRNPA1 [15], TDP-  
69 43 [15,16], C9ORF72 [17–19] and Ddx4 [20]. Recently, we and others discovered that another  
70 amyloid forming IDP, the microtubule binding protein tau, also undergoes LLPS [21–25].  
71 Interestingly, many of the LLPS forming IDPs have been observed to form amyloid fibrils in  
72 cell-free systems [13,15], leading to a number of hypotheses regarding the physiological role of  
73 LLPS in regulating aggregation. In particular, a compelling idea is that protein LLPS may be an  
74 intermediate regulatory state, which could redissolve into a soluble state or transition to  
75 irreversible aggregation/amyloid fibrils [13–15,21,22].

76 In a healthy neuron, tau is bound to microtubules. When tau falls off the microtubule  
77 under adverse conditions to the cell, tau is solubilized in the intracellular space as an IDP. Under  
78 certain conditions, tau forms intracellular fibrillary tangles, a process linked to  
79 neurodegenerative tauopathies that include Alzheimer’s disease. In recent work, we showed that

80 tau in neurons strongly (nanomolar dissociation constant) and selectively associates with smaller  
81 RNA species, most notably tRNA [22]. We also found tau and RNA, under charge matching  
82 conditions, to undergo LLPS [22] in a process determined to be complex coacervation (CC) [26].  
83 We found that tau-RNA LLPS is reversible, and persisted for > 15 hours without subsequent  
84 fibrilization of tau, and hypothesized that LLPS is potentially a physiological and regulatory state  
85 of tau.

86 In this work, we characterize the phase diagram of tau/RNA LLPS using a combination  
87 of experiment and simulation, and thereby specify the conditions that drive the system towards a  
88 homogeneous phase or an LLPS state. We study a N-terminus truncated version of the longest  
89 isoform of human 4R tau *in vitro*, and first demonstrate that tau/RNA complexation is reversible,  
90 and that tau remains dynamic and without a persistent structure within the dense phase. The  
91 phase coexistence curve separating a supernatant phase from a condensate phase is determined  
92 by the system's free energy, which in turn is state dependent, *i.e.* dependent on concentration,  
93 temperature, salt, and the nature of the interaction strength between the various solution  
94 constituents, including the solvent. We construct the phase diagram from cloud-point  
95 measurements of the onset of complex coacervation under varying conditions of temperature,  
96 salt, and polymer concentrations. These experiments establish the features and phase coexistence  
97 boundaries of the phase diagram, which we then model using theory and simulation to rationalize  
98 and understand the physical mechanisms that drive and stabilize LLPS.

99 A number of theoretical models can be used to model LLPS, each with their own  
100 advantages and disadvantages. Ideally, one would turn to simulations at atomic resolution in  
101 explicit solvent; however, such models are computationally prohibitive given the multiple orders  
102 of magnitude in time and length scales involved in LLPS. Turning to the polymer physics

103 literature, theoretical treatments of simplified coarse-grained models are much more  
104 computationally tractable, and offer useful insight. Although approximate, analytical theories can  
105 be formulated, providing an extremely efficient platform for describing the thermodynamics of  
106 polyelectrolyte mixtures [27]. These include the Flory-Huggins model [28], the Voorn-Overbeek  
107 model [6,29–34], the random-phase approximation [35–37], the Poisson-Boltzmann cell model  
108 [38,39], as well as other more sophisticated approaches[40–42], which have been applied to  
109 synthetic polymers with low sequence heterogeneity [29,43–46], and to proteins with single  
110 composition [2,20,47,48]. While such models have been successful in describing simpler  
111 polyelectrolytes, it is less apparent that these models are suitable to describe the complex  
112 coacervation of the more complicated tau/RNA system. The simplest approach that one can use  
113 is the Flory-Huggins (FH) model, augmented by the Voorn and Overbeek (VO) correction to  
114 describe electrostatic correlations. This model is widely used to model LLPS; however, while  
115 experimental data can be fit to the model [2,20], ultimately the FH-VO model has serious  
116 inadequacies. The original Flory-Huggins model is a mean-field theory, which means that  
117 fluctuations in polymer densities away from their average value in each phase are neglected.  
118 Augmenting the FH model with a VO treatment of electrostatics approximately accounts for  
119 charge correlations, but it entirely neglects chain-connectivity [49]. Thus, the FH-VO model is  
120 unable to model the spatially varying charge distribution along the polymer backbone. Ideally,  
121 one would like to introduce chain connectivity, charge correlation, and uneven charge  
122 distribution into a more realistic polymer physics model; however, a full treatment of polymer  
123 density fluctuations is analytically intractable. One possible approach is to pursue a Gaussian  
124 approximation to field fluctuations, also known as the random phase approximation (RPA) [50–  
125 52]. The RPA model can be viewed as a lowest-order correction to the mean field

126 approximation, and was recently introduced to describe the charge pattern and sequence-  
127 dependent LLPS of IDPs [53,54]. The advantage of the RPA model, over the mean-field FH-VO  
128 model, is that charge correlations are introduced in a formally consistent manner. Nonetheless, it  
129 has been recently demonstrated that the RPA model fails to quantitatively predict polymer  
130 concentrations in the dilute phase, given that higher-order fluctuations are important in this  
131 regime [55,56].

132 Of all the models described above, fitting experimental data with the FH or FH-VO  
133 theory is currently the preferred methodology in the LLPS community to describe and analyze  
134 phase diagrams. We demonstrate that this model can be fit to describe our experimental data, but  
135 the learning outcome from this modeling is limited. Thus, we take a different approach by  
136 computing the exact phase diagram of an off-lattice coarse-grained polyelectrolyte model using  
137 field theoretic simulations (FTS). FTS is a numerical approach that allows one to fully account  
138 for fluctuations, and thus serves as an approximation-free method to compute equilibrium  
139 properties from a suitably chosen coarse-grained representation of the true system. The ability to  
140 perform field theoretic simulations enables us to include the important physics of polymer  
141 sequence-specificity that cannot be captured by FH-VO, including charge distribution and chain  
142 connectivity. Results from FTS are compared to those obtained from the FH-VO model.

143 The model substantiates the experimental phase diagram that the equilibrium window for  
144 the complex coacervation of tau and RNA under cellular conditions is narrow. Guided by the  
145 phase diagram, empirically obtained from *in vitro* experiments and validated by simulation, we  
146 finally show that LLPS of tau-RNA can be established and rationalized under cellular co-  
147 culturing conditions in the presence of live cells.

148

149

## 150 **Results**

151

### 152 **Tau-RNA complex coacervate is reversible and a dynamic liquid phase.**

153 Truncated versions of the longest isoform of human 4R tau, residues 255-441 [57] and  
154 residues 255-368 were used to study tau-RNA complex coacervation (CC). A C291S mutation  
155 was introduced to either tau variant, resulting in single-cysteine constructs. Thioflavin T assays  
156 and TEM imaging were performed showing these variants retain the capability to form fibrils  
157 with morphology similar to full length tau. Unless otherwise specified, we refer to these two  
158 single-cysteine tau constructs as tau187 and tau114 (tau114 is close to K18, 244-372 [58]),  
159 respectively, while tau refers collectively to any of these variants (see SI methods for  
160 experimental details). Importantly, experiments were performed with freshly eluted tau within 30  
161 minutes upon purification to minimize the effects of possible disulfide bond formation. This  
162 minimizes the influence of the cysteine mutations on the LLPS behavior of tau-RNA CC. The  
163 single-cysteine containing tau187 can be singly spin labeled at site 322, referred to as tau187-SL  
164 (see SI methods). Full length tau, tau187 and tau114 are overall positively charged with an  
165 estimated +3, +11 and +11 charge per molecule at neutral pH, respectively, based on their  
166 primary sequences. The charged residues of tau are more concentrated in the four repeat domains  
167 (Fig 1A). PolyU RNA (800~1000 kDa), which is a polyanion carrying 1 negative charge per  
168 uracil nucleotide, was used in this study and henceforth referred to as RNA (Fig 1A). Under  
169 ambient conditions, both tau and RNA are soluble and stable in solution. By mixing tau and  
170 RNA under certain conditions, a turbid and milky suspension was obtained within seconds,  
171 where tau and RNA formed polymer-rich droplets (dense phase) separated from polymer-  
172 depleted supernatants (dilute phase) (Fig 1B). These polymer-rich droplets are tau-RNA CCs.

173 We began by determining the concentration of the dense and dilute phases. After mixing and  
174 centrifuging 60  $\mu\text{L}$  tau187-RNA droplet suspension, we separated a polymer-rich phase of  
175 volume  $<1 \mu\text{L}$  with a clear boundary against the dilute supernatant phase. Applying UV-Vis  
176 spectroscopy (see SI methods), we determined the concentration of tau and RNA inside the  
177 droplets as  $>76 \text{ mg/mL}$  and  $>17 \text{ mg/mL}$  with partitioning factors of  $>15$  and  $>700$  respectively.  
178 This is consistent with our previously findings that tau is virtually exclusively partitioned within  
179 the dense phase [22]. High protein concentrations are typically correlated with higher propensity  
180 for irreversible protein aggregations. In order to verify that there was indeed no fibril formation,  
181 tau187-RNA CCs were prepared by mixing tau187-SL and RNA (see SI methods) and monitored  
182 by continuous wave electron paramagnetic resonance spectroscopy (For details of cw-EPR  
183 experiments see SI methods). The cw-EPR spectra shows no broadening (Fig 1C), and the cw-  
184 EPR spectra analysis reveals an unchanged rotational correlation time for the spin label of  
185 tau187-SL,  $\tau$ , of  $437 \pm 37 \text{ ps}$  as a function of time after  $> 96$  hours of incubation at room  
186 temperature (Fig 1D, turquoise) (see SI methods). For comparison, cw-EPR spectra and  $\tau$  were  
187 recorded of tau187-SL alone in buffer, and of tau187-SL in the presence of heparin under fibril  
188 forming conditions. Tau187-SL alone in buffer showed cw-EPR spectra overlapping with those  
189 of tau187-RNA CC, and rotational correlation time  $\tau$ ,  $425 \pm 16 \text{ ps}$ , nearly identical to the  $\tau$  of  
190 tau187-SL CCs (Fig. 1D, red). In contrast, tau187-SL with heparin shows a significantly  
191 broadened cw-EPR spectrum and an increasing  $\tau$  to  $2.3 \pm 0.7 \text{ ns}$  (Fig 1C, D, green). Note that a  
192 hundreds of ps range of  $\tau$  corresponds to rapid tumbling of the spin label, whose rotational  
193 degree of freedom is minimally hindered by molecular associations, while a several ns range of  $\tau$   
194 corresponds to slow tumbling and molecular hindering by association or confinement. The  
195 Thioflavin T (ThT) fluorescence curves of the same sample system as a function of time



196 confirms the absence of amyloid aggregate formation in tau187-RNA CCs (Fig S1). These  
197 results together suggest that tau187-RNA CCs are in an equilibrium state, in which tau retains its  
198 solution-like dynamics.

199 Next, we investigated the reversibility of tau187-RNA complex coacervation. Tau187-RNA  
200 CCs were prepared again and incubated by cyclically ramping the temperatures (1 °C/min)  
201 upwards and downwards, while the absorbance at  $\lambda = 500$  nm was monitored, referred to as  
202 turbidity hereafter. Ramping rates of 0.5 °C/min and 1 °C/min were tested, but the results shown  
203 to be indistinguishable. Microscopy images were concurrently acquired at low and high turbidity,  
204 confirming the appearance and abundance of CC droplets correlating with turbidity increase, and  
205 *vice versa* (Fig 1E). The turbidity-temperature curves show that at high temperature, samples  
206 became turbid with  $Ab_{500} \sim 1.5$  and abundance of CCs, while at low temperature, samples  
207 became transparent with  $Ab_{500} \sim 0$  and absence of CCs. This demonstrates tau187-RNA CC  
208 formation is favored at higher temperature, following clearly a lower critical solution  
209 temperature behavior (LCST) (Fig 1E) [59]. By cycling the temperature, we robustly and  
210 reversibly changed the tau187-RNA mixture between a turbid state to a completely transparent  
211 state (Fig 1E). The transition temperatures at which the turbidity emerged during heating and  
212 vanished during cooling stay invariant with repeated heating-cooling cycles. The method of  
213 extracting a cloud point for the LCST transition temperature from such data will be described in  
214 detail in the next section. Importantly, the history of temperature change does not affect the  
215 resulting state. Hence the formation and dissolution of tau187-RNA CCs are reversible and  
216 consistent with a path-independent equilibrium process. We point out that the maximum  
217 turbidity value successively decreases with each heating cycle (Fig 1E), even though the  
218 transition temperatures remain invariant. This can be attributed to slow degradation of RNA with

219 time, (as demonstrated in Fig S2) by verifying an altered turbidity change in the presence of  
220 RNase or RNase inhibitor.

221 It is understood that upon gradual heating of the solution phase, the mechanism of LLPS  
222 proceeds via a nucleation process [60], and hence there is a kinetic barrier evidenced by the  
223 observed hysteresis in Fig 1E. Nonetheless, we conclude that the final tau-RNA CC state reached  
224 upon heating is a true thermodynamic state, and thus can be modeled by an equilibrium theory of  
225 phase separation.

### 226 **Tau-RNA complex coacervate phase diagram**

227 To understand the principles and governing interactions driving tau-RNA CC formation,  
228 we constructed a phase diagram for tau187-RNA CC by measuring the transition temperature –  
229 to be described in greater detail below – as a function of protein concentration and salt  
230 concentration. We first recorded tau187-RNA turbidity at various [tau], [RNA] and [NaCl]  
231 values, ranging from 2-240  $\mu\text{M}$ , 6-720  $\mu\text{g/mL}$  and 30-120 mM, respectively. Titrating RNA to  
232 tau187, the turbidity was found to be peaked when [RNA]:[tau] reached charge matching  
233 condition at which the charge ratio between net positive and negative charges was 1:1 (which for  
234 tau187 and RNA used in this study corresponded to [tau187]:[RNA] = 1  $\mu\text{M}$  : 3  $\mu\text{g/mL}$ ),  
235 validating once more that LLPS is driven by complex coacervation (CC) (Fig S3). Henceforth,  
236 all phase diagram data are acquired at a charge matching condition between RNA and tau.  
237 Titrating NaCl to tau187-RNA, CC formation showed a steady decrease of turbidity (Fig S3).  
238 Combined, these demonstrate that tau187-RNA CC favors the condition of charge balance and  
239 low ionic strength, which is consistent with known properties of CC and previous findings [22].

240 We next investigated the phase separation temperatures under various sample  
241 compositions. Tau187-RNA CCs were prepared with a fixed [tau]:[RNA] ratio corresponding to

242 the condition of net charge balance. Therefore, the composition of tau187-RNA CC can be  
243 determined by  $[\tau]$  and  $[\text{NaCl}]$ . Samples were heated at  $1\text{ }^{\circ}\text{C}/\text{min}$  between  $T = 15\text{-}25\text{ }^{\circ}\text{C}$ , while  
244 the turbidity was monitored. The turbidity-temperature data of the heating curves were then fit to  
245 a sigmoidal function, so that the cloud point temperature,  $T_{\text{cp}}$ , could be extracted as shown in Fig  
246 2A ( $T_{\text{cp}}$  was determined from heating curves out of practical utility;  $T_{\text{cp}}$  from cooling curves is  
247 possibly closer to thermodynamic transitions). The experimental cloud-point temperature  $T_{\text{cp}}$  for  
248 CC formation as a function of  $[\tau]$  and  $[\text{NaCl}]$  are shown (as points) in Fig 2B and Fig 2C. The  
249 experimental data points show that increasing  $[\tau]$  lowers  $T_{\text{cp}}$ , favoring CC formation, while  
250 increasing  $[\text{NaCl}]$  raises  $T_{\text{cp}}$ , disfavoring CC formation. Such trends were observed at two  $[\text{NaCl}]$   
251 and two  $[\tau]$  values, respectively (Fig 2B, 2C). Experimentally,  $T_{\text{cp}}$  was determined for a range  
252 of  $[\tau]$  and  $[\text{NaCl}]$  conditions (see Fig S4).

253 The features of the Tau-RNA CC phase diagram were also investigated by comparing  
254 tau187 and tau114. Tau187-RNA CC and tau114-RNA CC were prepared with  $20\text{ }\mu\text{M}$  tau187  
255 and  $28\text{ }\mu\text{M}$  tau114, so that the total concentration of polymer, i.e. tau and RNA, reaches  $0.5$   
256  $\text{mg}/\text{mL}$ . Turbidity was recorded at varying  $[\text{NaCl}]$ . Similar to the observation with tau187-RNA  
257 CC, tau114-RNA CC showed decreasing turbidity at increasing  $[\text{NaCl}]$  (Fig S5). The  $[\text{NaCl}]$   
258 values where turbidity reaches 0 were estimated as  $131\text{ mM}$  and  $150\text{ mM}$  for tau187 and tau114,  
259 respectively, implying CC formation is more favorable with tau114 that hence can sustain higher  
260  $[\text{NaCl}]$ . Based on this,  $20\text{ }\mu\text{M}$  of tau187,  $131\text{ mM}$  of NaCl and room temperature,  $20\text{ }^{\circ}\text{C}$ , were  
261 used as the phase separation conditions ( $[\tau]$ ,  $[\text{NaCl}]$  and  $T_{\text{cp}}$ ) for tau187, and  $28\text{ }\mu\text{M}$ ,  $150\text{ mM}$   
262 and  $20\text{ }^{\circ}\text{C}$  for tau114. These two experimental conditions were used in the next section for  
263 comparing the two constructs of tau.

264

## 265 Flory-Huggins-Voorn-Overbeek Fit to Experimental Phase Diagram

266 We next used the FH-VO model to fit the experimental data for the tau187-RNA CC  
267 system, as is commonly done in LLPS studies. Despite its theoretical deficiencies the FH-VO  
268 model is commonly used for its simplicity and ease of implementation. Our system consists of  
269 five species: tau187, RNA, monovalent cation ( $\text{Na}^+$ ), anion ( $\text{Cl}^-$ ) and water. For simplicity, we  
270 explicitly consider only the effect of excess salt, and do not include polymer counterions. The  
271 FH-VO model maps these five species onto a three-dimensional lattice (Fig 2D). Each polymer  
272 is treated as a uniform chain with degree of polymerization  $N$  and average charge per monomer  
273  $\sigma$ .  $N$  was taken as the average chain length of the species (1 for monovalent ions). The charge  
274 density  $\sigma$  of RNA, monovalent ions and water were set to 1, 1 and 0 respectively. The values for  
275  $\sigma$  of tau187 or tau114 were calculated from the net charge at neutral pH divided by the chain  
276 length. The composition of the species is expressed in terms of the volume fraction  $\phi$  of the  
277 occupied lattice sites, which are proportional to the molar concentrations (see SI methods for  
278 details). As in experiments, tau187-RNA CCs were prepared at fixed  $[\text{tau}]:[\text{RNA}]$  and  
279  $[\text{Na}^+]:[\text{Cl}^-]$  ratios. Under these two constraints, the volume fraction of all five species in tau187-  
280 RNA CC listed above can be determined with two variables,  $[\text{tau}]$  and  $[\text{NaCl}]$ , which are  
281 experimentally measurable.

282 Given  $N$ ,  $\sigma$ ,  $[\text{tau}]$ ,  $[\text{NaCl}]$  and  $T_{\text{cp}}$ , the task is to find  $\phi_{\text{tau}}^{\text{I}}$  and  $\phi_{\text{tau}}^{\text{II}}$ , the volume fractions of  
283 tau in the dilute and dense, coacervate, phase at equilibrium, i.e. the binodal coexistence points.  
284 The model and procedure is described in detail in the SI methods. For each experimental  
285 observation of  $T_{\text{cp}}$  determined for a given  $[\text{tau}]$  and  $[\text{NaCl}]$  (Fig S4), the FH-VO expression has  
286 one unknown parameter, the Flory-Huggins  $\chi$  term. The Flory-Huggins  $\chi$  parameter is introduced  
287 as an energetic cost to having an adjacent lattice site to a polymer segment occupied by a solvent

288 molecule [61]. Here we take  $\chi$  to be an adjustable parameter, such that given a suitable  
289 expression for  $\chi$ , the complete binodal curve can be modeled with the FH-VO theory.  
290 Consequently, we first solved for  $\chi$  at each given experimental condition, so that the theoretical  
291 binodal curve intersects the experimental data point. Fig 2E shows two representative examples  
292 of a theoretical binodal curve (solid line) intersecting a single experimental data point at the  
293 given [NaCl] and [tau]. This procedure gives an empirical  $\chi$  parameter for each experimental  
294 data point, as collated in Fig 2F as a function of  $1/T_{cp}$ . We then performed to this set of  
295 experimental data a least-squares fit of the empirical  $\chi$  parameter to the form  $A + B/T$  (Fig 2F),  
296 yielding an expression of the temperature dependence of  $\chi$  of

$$297 \quad \chi(T) = 1.8 - \frac{390}{T}, R^2 = 0.67. \quad (\text{Equation 1})$$

298 Finally, from this expression for  $\chi(T)$ , we computed the binodal curves that establishes the phase  
299 coexistence as a function of  $T_{cp}$ , [tau] and [NaCl], shown as solid lines, only for the dilute phase  
300 coexistence for  $T_{cp}$  vs [tau] (Fig 2B) and  $T_{cp}$  vs [NaCl] (Fig 2C). For the full phase diagram  
301 showing both dilute and dense binodal curves see Fig. S7. The experimental data (shown as  
302 points) and computed binodal curves both exhibited a decreasing  $T_{cp}$  with increasing [tau] and  
303 an increasing  $T_{cp}$  with increasing [NaCl]. This simply establishes that tau-RNA CC favors higher  
304 tau concentrations in the 1-240  $\mu\text{M}$  range and lower ionic strength in the 30-120 mM range  
305 tested here. Binodal curves for tau114-RNA CC were also computed, and are compared with  
306 tau187-RNA CC, along with experimental data (Fig. S5). Comparison of the two constructs  
307 shows that tau114-RNA CC has a lower  $T_{cp}$  than tau187-RNA CC, suggesting it is more  
308 favorable to phase separation. This qualitatively agrees with experimental observations. Note  
309 that the experimental conditions are for [tau] and [RNA] set at charge matching conditions for  
310 maximal CC, and thus [tau] and [RNA] are locked relative to each other. When [RNA] falls

311 either well below or well above charge matching condition relative to  $[\tau]$ , it is expected that the  
312 LLPS envelope will collapse.

313

### 314 **Field theoretic simulations of a coarse-grained model of tau-RNA complex** 315 **coacervation**

316

317 Although the FH-VO model can be brought into agreement with experiment through a judicious  
318 choice of  $\chi$ , it is fundamentally unsound from a theoretical perspective, noticeably because it  
319 neglects connectivity between charges on the same chain. This is a severe limitation because it is  
320 expected that subtle difference in primary amino acid sequences may have a profound effect on  
321 the phase diagram. A particularly appealing alternative to gain insights into the thermodynamics  
322 of LLPS is to perform field theoretic simulations (FTS) on a physically motivated polyelectrolyte  
323 model (Fig 3), in which each amino acid is represented by a single monomeric unit of length  $b$  in  
324 a coarse-grained bead-spring polymer model. The charge of each segment is unambiguously  
325 assigned from the particular amino acid charge at pH 7.0. In addition to harmonic bonds between  
326 nearest neighbors, which enforces chain connectivity, all segment pairs interact via two types of  
327 non-bonded potentials: a short-ranged excluded volume repulsion and a long-range electrostatic  
328 interaction between charged monomers (see Fig 3). We take the polymers to be in a slightly good  
329 solvent, meaning that favorable interactions between monomers and solvent cause chain  
330 swelling. In such cases, the excluded volume interaction is modeled as a repulsive Gaussian  
331 function between all monomer pairs with a strength that increases with solvent quality [62].  
332 Conversely, as solvent quality decreases, the excluded volume repulsion decreases, approaching  
333 zero at the so-called theta condition. In the present case we limit ourselves to the case where the  
334 excluded volume is positive and small, i.e. a good solvent near the theta condition. Simulations

335 are performed using a single excluded volume strength,  $v$ , identical for all monomers, which is  
336 an input parameter in the model and can be adjusted to parameterize the favorable monomer-  
337 solvent interactions. Additionally, the long-range electrostatic interactions are described by a  
338 Coulomb potential in a screened, uniform, dielectric background. The length scale of the  
339 electrostatic interactions is parameterized by the Bjerrum length  $l_B$ , which is the distance at  
340 which the electrostatic interactions become comparable to the thermal energy  $k_B T$  and is defined  
341 as

$$342 \quad l_B = \frac{e^2}{4\pi\epsilon_0\epsilon_r k_B T} \quad (\text{Equation 2})$$

343 where  $e$  is the unit of electronic charge,  $\epsilon_r$  the dielectric constant ( $\epsilon_r = 80$  for water), and  $\epsilon_0$   
344 the vacuum permittivity.

345 The main features of the model used for FTS here are the inclusion of chain connectivity,  
346 charge sequence-dependence for the electrostatic interactions based on the primary amino acid  
347 sequence of tau, solvation effects which are parameterized by the single excluded volume  
348 parameter,  $v$ , and an electrostatic strength parameterized by the Bjerrum length,  $l_B$ . FTS is  
349 performed in implicit solvent with a uniform dielectric background. We assume that the polymer  
350 chains are in a fully dissociated state, and we do not explicitly represent counter ions. The effect  
351 of excess salt is included in our model by introducing point charges explicitly, which engage in  
352 Coulomb interactions with all other charged species and repel other ions and polymer segments  
353 at short distances by the same Gaussian excluded volume repulsion. By introducing explicit  
354 small ions in this manner, we are neglecting strong correlations such as counter ion  
355 condensation; however, we are allowing for weak correlations of the Debye-Hückel type. The  
356 explicit addition of salt will serve to screen the electrostatic interactions and inhibit the driving  
357 force for CC, in agreement with the experiments.

358           Details of the FTS protocol are described in the SI methods. By performing FTS at  
359 various state points and computing equilibrium properties, we first set out to fully explore the  
360 parameter space relevant for LLPS in this model. This involves running simulations at different  
361 conditions analogous to experiments. For each simulation the thermodynamic state of the system  
362 is determined by specifying a particular value for the dimensionless excluded volume parameter  
363  $v/b^3$ , the dimensionless Bjerrum length  $l_B/b$ , and the dimensionless monomer number density  
364  $\rho b^3$ . Fig 4 shows the final polymer density configuration for two representative simulations at a  
365 monomer density of  $\rho b^3 = 0.22$  at different thermodynamic conditions (see caption for Fig 4 for  
366 details). Although the bulk density is fixed and identical for the two cases, the local polymer  
367 density is free to fluctuate. The left simulation box (Fig 4) shows a case where a single phase is  
368 favored, indicated by a nearly homogenous polymer density throughout the simulation box  
369 (white/blue). This is contrasted by the right simulation box (Fig 4) depicting the case where the  
370 system phase separates into a dilute polymer-deplete region (white) and a dense polymer-rich  
371 droplet region (red)—the coacervate phase with the color signifying the polymer density. Fig 4  
372 shows that given suitable parameterization, FTS can be used to study complex coacervation of a  
373 coarse-grained tau-RNA model. Given this observation, we next map out the full phase diagram  
374 in the parameter space of the model while fixing the physical parameters of charge sequence,  
375 chain length, and chain volume fractions that are consistent with the experimental conditions.

376

### 377 **Field theoretic simulations predict phase equilibria around physiological conditions**

378           The parameters to be explored in connection with phase behavior are the strength of the  
379 interactions in the polyelectrolyte model: the excluded volume strength  $v$  and the Bjerrum length  
380  $l_B$ . A direct comparison between FTS and the experimental phase diagram will be deferred until  
381 the following section. The phase coexistence points (binodal conditions) for a given value of the



382 excluded volume  $v$  and Bjerrum length  $l_B$  can be obtained by running many simulations over a  
383 range of concentrations, and finding the concentration values at which the chemical potential and  
384 the osmotic pressure are equal in both phases (see Fig. S10). The procedure is described in the  
385 SI, and is repeated for many different  $v$  and  $l_B$  combinations. The resulting phase diagram will be  
386 a three-dimensional surface which is a function of  $\rho$ ,  $v$ , and  $l_B$ . In Fig 5A, we show a slice of this  
387 surface along the  $l_B - \rho$  plane with a fixed value of  $v = 0.0068 b^3$ , and in Fig 5B we show a  
388 slice along the  $v - \rho$  plane with a fixed  $l_B = 1.79 b$  (at  $T = 293$  K, Eq. 3). It should be noted that  
389 Fig 5 presents the first approximation-free phase diagrams presented in the literature of a  
390 theoretical model describing a biological complex coacervate system. From Fig 5, one can see  
391 that  $l_B$  and  $v$  have counteracting effects, namely increasing  $v$  that is caused by increased solvent  
392 quality destabilizes the coacervate phase and favors the single phase, whereas increasing  $l_B$  that  
393 is caused by reduced electrostatic screening favors coacervation, and destabilizes the single  
394 phase. The physical interpretation of the trends in Fig 5 is that the actual binodal for the  
395 experimental system will depend on two competing features: the solvent quality proportional to  
396  $v$ , which inhibits coacervation, and the electrostatic strength of the media proportional to  $l_B$   
397 which promotes coacervation.

398 The FTS- derived phase diagram shown in Fig 5 provides a guide how to experimentally tune  
399 the window for complex coacervation by changing the relative contribution of the solvent quality  
400 or the dielectric strength. Experimentally, the solvent quality can be decreased by adding  
401 crowding agents or by changing the hydrophilic/hydrophobic amino acid composition, while the  
402 electrostatic strength can be controlled by the salt concentration. Increasing salt concentration  
403 tends to decrease the bare electrostatic strength by screening the charges, and this is predicted to

404 stabilize the single phase solution mixture against coacervation, in agreement with experimental  
405 observation. We explore these ideas further below in the context of tau coacervation *in vivo*.

406 Despite the simplicity of the coarse-grained description, the model predicts that these two  
407 competing parameters, excluded volume vs. electrostatic interactions, are nearly balanced around  
408 physiological salt concentration, temperature, and protein concentration. Assuming that the  
409 relative dielectric constant for water is  $\epsilon_r = 80$ , and that the segment size  $b$  is approximately  
410 equivalent to the distance between  $C_\alpha$  carbons, i.e.  $b \sim 4 \text{ \AA}$ , it follows that  $l_B = 1.75b$  at 300 K.  
411 ( $l_B = 0.7 \text{ nm}$  at 300 K). In the  $l_B - \rho$  plane (shown in Figure 5A), at the cross section of  
412  $l_B = 1.75$ , three points for  $\rho b^3$  are indicated that correspond to 1, 5, and 10  $\mu\text{M}$  for tau  
413 concentrations at 300 K. Here we have implicitly assumed that at physiological temperature and  
414 in a crowded cellular environment tau is near the theta condition, and thus  $\nu$  is small. This  
415 analysis suggests that small modulation in the experimental conditions, such as changes in the  
416 temperature or salt concentration, local pH or crowding effects (via the excluded volume  
417 parameter  $\nu$ ) can readily and reversibly induce complex coacervation *in vivo* under physiological  
418 conditions.

## 419 **Comparison between simulation and experiment**

420 In the preceding section we presented the phase diagram from FTS explicitly in terms of the  
421 model parameters of the excluded volume  $\nu$  and Bjerrum length  $l_B$ . We now seek to compare our  
422 simulation results directly with the experimental phase diagram. This requires knowing precisely  
423 how the model parameters depend on temperature. We again take the monomer size  $b$  to be  
424 approximately the distance between the  $C_\alpha$  carbons  $b \sim 4 \text{ \AA}$ , and assume a dielectric constant of  
425  $\epsilon_w = 80$  for pure water. The relative dielectric  $\epsilon_r$  at a given salt concentration is then estimated

426 from Equation 2. With these values, the Bjerrum length  $l_B$  can be estimated from Equation 3 at  
427 the experimental cloud point temperature (Fig 6A), which leaves only one unknown parameter  $\nu$ .

428 The excluded volume is typically taken to be proportional to  $(1 - \theta/T)$  where  $\theta$  is the theta  
429 temperature, the temperature at which the chain follows ideal chain statistics [62–64]. For LCST  
430 behavior it is customary to introduce the form  $\nu = -\nu_0(1 - \theta/T)$  where  $\nu_0$  controls the  
431 magnitude of the excluded volume interactions [65]. This form of the excluded volume implies  
432 that at temperatures lower than the theta temperature, the excluded volume is repulsive ( $\nu > 0$ ,  
433 meaning a good solvent) and for temperatures above the theta point, the excluded volume  
434 becomes attractive ( $\nu < 0$ , poor solvent conditions). By adjusting the excluded volume in FTS to  
435 fit a subset of the experimental data, (shown in Fig. 6B), we then perform a linear fit to obtain a  
436 value of  $\nu_0 = 0.25b^3$  and  $\theta = 309$  K. Note that in the range of temperatures considered, the  
437 excluded volume remains positive. However, for temperatures higher than  $\theta$ , when the excluded  
438 volume becomes negative, the polymer chain will collapse, consistent with the observation in the  
439 literature [66], which showed that tau undergoes a thermal compaction at high temperatures due  
440 to entropic factors [63]. In such high temperature regimes a more sophisticated treatment is  
441 needed; however, all our experimental conditions remain below this threshold. Having mapped  
442 the two model parameters  $\nu$  and  $l_B$  to the experimental temperature, we can compare directly the  
443 FTS with the experimental results (Fig 6C). The calculated FTS data points under the condition  
444 of low salt concentration are shown as filled green squares in Fig 6C.

445 Next, explicit salt ions were introduced as point charges to simulate an excess salt  
446 concentration of 120 mM. We make the assumption that the salt is equally partitioned in both  
447 phases, and thus the concentration of salt is a constant, allowing us to sweep the polymer  
448 concentration at fixed salt concentration to find the phase coexistence points. A more detailed

449 FTS study of salt partitioning performed using a Gibbs ensemble method found that under  
450 conditions of nearly charge-balanced polymers, as is the case in the system of this study, the salts  
451 are nearly equipartitioned and counterion condensation is not a dominant factor [67]. Simulations  
452 performed in this manner with explicit salt are shown as open green squares in Fig 6C. The FTS  
453 data clearly demonstrate that the effect of added salt is to stabilize the single solution phase, and  
454 to raise the binodal closer to physiological temperature 37 °C, in agreement with experiments  
455 (filled red and blue circles Fig 6C). The complementary dense branch of the binodal curve is also  
456 predicted from FTS and is shown in Fig. S11.

### 457 **Application to cell-complex coacervate co-culture**

458 Looking at the experimental and calculated phase diagrams (Fig 2B, 2C), it is seen that  
459 under physiological conditions ( $T_{cp} \sim 37$  °C,  $[\text{NaCl}] \sim 100$  mM) it is principally feasible for cells  
460 to tune the formation of tau-RNA CCs. This has important implications for studying the  
461 physiological roles of tau-RNA CCs, and thus we asked if tau-RNA CCs could indeed exist in a  
462 biologically relevant media in the presence of living cells. Both the FH-VO theory and FTS  
463 predict that the conditions of high protein concentration, low ionic strength, high temperature  
464 and high crowding reagents (acting to lower the excluded volume) would independently favor  
465 tau-RNA CC formation. Using these tuning parameters as a guide, we designed several  
466 experiments to test the ability for tau-RNA CCs to form in a co-culture with H4 neuroglioma  
467 cells. We incubated H4 cells with tau187/tau114-RNA under CC conditions at varying  
468 temperatures, polymer concentrations and crowding reagent concentrations. At low polymer  
469 concentrations (10  $\mu\text{M}$  tau, 30  $\mu\text{g/ml}$  RNA) no LLPS was observed in the cellular media (Fig 7,  
470 first column), where increasing the temperature to 37 °C did not apparently influence the  
471 solution phase (Fig 7, first column, first and third row). However, when tau and RNA  
472 concentrations were increased (100  $\mu\text{M}$  tau, 300  $\mu\text{g/ml}$  RNA) LLPS could be observed (Fig 7,

473 second column). Further, LLPS could also be achieved by adding an additional crowding reagent  
474 (here PEG) to low concentration samples of tau and RNA (Fig 7, third column). As predicted,  
475 LLPS of tau-RNA CC was modulated by (i) temperature, (ii) tau and RNA concentration and/or  
476 (iii) the presence of crowding reagent PEG (Fig 7). Lowering the temperature to 18°C  
477 significantly reduced the number and size of fluorescent droplets, demonstrating that tau-RNA  
478 LLPS is indeed tunable by temperature, and demonstrate the biological consequence of the  
479 LCST behavior (Fig 7, first and third row). These results were consistently found for both tau187  
480 and tau114 systems. The successful application of FTS for tuning and predicting tau-RNA CCs  
481 in cellular media is a first step towards understanding the physiological condition under which  
482 tau-RNA LLPS, which follows the CC mechanism, can occur. The conditions described for  
483 LLPS here suggests that conditions exist *in vivo* under which LLPS by complex coacervation  
484 may be achieved.

## 485 **Discussion**

486 The ability of tau to undergo LLPS via a mechanism of complex coacervation has been  
487 recognized in a number of recent publications [21,25] [22]. However, to date, the criteria and  
488 physical parameters (specifically, polymer concentration, ionic strength, temperature and  
489 crowding reagents) that drive tau-RNA CC has not been rationalized. In this paper, we mapped  
490 out the experimental phase diagram for tau-RNA CC, and used theory and simulation to describe  
491 the parameter space for LLPS. In what follows, we discuss the relevance of our findings in the  
492 context of the physical mechanism of LLPS *in vivo*.

493 Although the FH-VO model cannot model spatially varying charges along the peptide  
494 backbone, we were able to fit the experimental data by treating the Flory-Huggins  $\chi$  parameter as  
495 an empirical, temperature-dependent, adjustable parameter. This result highlights the fact that the

496 FH-VO model is adaptable to experimental data. Still, the FH-VO model has limited  
497 predictability, and should be seen as a qualitative descriptor of phase separation. In contrast, FTS  
498 is an approximation-free analysis that can provide physical insight and predictive information for  
499 biopolymers, such as scaling relationships and polymer or protein sequence effects. As shown  
500 above, the tau-RNA phase diagram was successfully reproduced by FTS using model parameters  
501 that are reasonable estimates of the experimental physical conditions. With reasonable estimates  
502 for the parameters in our polymer model ( $\epsilon_r = 80$ ,  $b = 4 \text{ \AA}$ ), our simulations predict that the  
503 lower phase boundary falls in the vicinity of physiological conditions. This finding suggests that  
504 FTS can be a powerful theoretical modeling technique to describe and rationalize tau-RNA CC  
505 as a competition between short-ranged excluded volume interactions and long-ranged  
506 electrostatic interactions.

507 Consider that we can partition the driving forces of CC as

$$\Delta G^{CC} = \underbrace{\Delta H^{\text{tau/RNA}}}_{(-)} - \underbrace{T\Delta S^{\text{comb}}}_{(-)} + \underbrace{\Delta H^{\text{ex}} - T\Delta S^{\text{noncomb}}}_{\text{excluded volume or } \chi}$$

508 where the first two terms are the negative (favorable) enthalpic contribution from tau/RNA  
509 interactions and the ideal entropy of mixing term (which is negative because we are considering  
510 CC formation). These first two terms are approximately accounted for in the original VO model,  
511 and by themselves predict UCST behavior (see SI). The last two terms introduce an non-ionic  
512 excess enthalpic contribution and a nonideal, noncombinatoric entropy that are introduced into  
513 the FH-VO model through the Flory-Huggins  $\chi$  parameter, or within FTS through the  
514 temperature dependent excluded volume. Given the experimental observation of LCST phase  
515 behavior, these terms must be important and we now estimate their value from our model.

516 Modeling the LCST experimental tau-RNA CC phase diagram using the FH-VO model  
517 by invoking an entropic term in the Flory-Huggins  $\chi$  parameter, or by FTS using a temperature

518 dependent excluded volume, both provide an estimate of the entropic contribution that drives CC  
519 formation. The temperature-dependent excluded volume  $v$  used to describe LCST phase behavior  
520 within FTS can be formally related to the Flory-Huggins  $\chi$  parameter to second order in the  
521 polymer volume fractions  $v = b^3(1 - 2\chi)$  [68]. Substituting our empirical excluded volume, we  
522 obtain from FTS an interaction parameter  $\chi$  of the form  $\chi = \epsilon_s + \epsilon_H/T$ , with  $\epsilon_s$  being a non-  
523 combinatoric entropic term and  $\epsilon_H$  an enthalpic term. Introducing conventional units (see SI  
524 methods for details) gives an unfavorable non-electrostatic enthalpy of phase separation of  $\Delta H^{\text{ex}}$   
525  $= 0.23 \text{ kJ} \cdot \text{mol}^{-1}$  of monomer, and a favorable noncombinatoric entropy of phase separation of  
526  $T\Delta S^{\text{noncomb}} = 1.1 \text{ kJ} \cdot \text{mol}^{-1}$  of monomer at  $T = 300 \text{ K}$ . For comparison, the empirical  $\chi$  from  
527 fitting the experimental data with the FH-VO model gives  $\Delta H^{\text{ex}} = 2.3 \text{ kJ} \cdot \text{mol}^{-1}$  of monomer and  
528  $T\Delta S^{\text{noncomb}} = 3.24 \text{ kJ} \cdot \text{mol}^{-1}$  of monomer.

529 Notably,  $\Delta H^{\text{ex}}$  is small and positive. We hypothesize that the positive, i.e. nonionic,  
530 enthalpy value for forming a coacervate phase is due to the requirement of breaking favorable  
531 interactions between hydrophilic residues and water that stabilizes the solution phase of tau  
532 ( $\Delta H^{\text{ex}} = -\Delta H^{\text{tau/water}}$ ). For comparison, the enthalpy of forming a hydrogen bond  $\Delta H_{\text{HB}}$  at room  
533 temperature is  $\sim -8 \text{ kJ} \cdot \text{mol}^{-1}$  [69] while the enthalpy of hydration for a polar amino acid  $\Delta H_{\text{hyd}}$   
534 is  $\sim -60 \text{ kJ} \cdot \text{mol}^{-1}$  [70,71]. Given that  $\Delta H^{\text{tau/RNA}}$  for tau-RNA association is negative and tau  
535 remains hydrated in the CC state (i.e. tau-water interface is not dehydrated), there has to be a  
536 source of penalty in the form of a positive  $\Delta H^{\text{ex}}$  value; the unfavorable  $\Delta H^{\text{ex}}$  associated with tau-  
537 RNA CC might come from the loss of hydrogen bonds in the hydration shell from overlapping  
538 and sharing of the tau hydration shells in the dense CC phase.

539 The  $T\Delta S^{\text{noncomb}}$  value is also small, positive and of comparable magnitude as  $\Delta H^{\text{ex}}$ , making  
540 temperature increase a facile modulator favoring tau-RNA CC. Given the positive value of  $\Delta H^{\text{ex}}$

541 for tau-RNC CC, the entropy gain upon phase separation is contributing to the driving force of  
542 tau-RNA CC formation (besides the electrostatic correlation energy between the polycationic  
543 and polyanionic polymer segments that is the major driving force). Looking to potential origins  
544 for positive  $T\Delta S^{\text{noncomb}}$ , we consider the entropy gain of breaking a hydrogen bond of  $T\Delta S_{\text{HB}} \sim 6$   
545  $\text{kJ} \cdot \text{mol}^{-1}$  [69] and the entropy gain associated with the release of a single water molecule from a  
546 hydrated surface of  $\sim 7.5 \text{ kJ} \cdot \text{mol}^{-1}$  [72]. Given that our FTS study only considered excess ions,  
547 but no counterions, while fully capturing the LCST behavior through the excluded volume,  $v$ , our  
548 results are consistent with the hypothesis that competing hydrophilic/hydrophobic interactions  
549 are responsible for the LCST behavior [73–75]. At low temperatures, the attractive interaction  
550 between water and hydrophilic residues of the biopolymer stabilize the homogenous phase, but  
551 above a critical temperature hydrophobic interactions become dominant, in that it becomes more  
552 favorable for water to be released from the polymer surface and hydration shell, and for tau and  
553 RNA to associate. In this scenario, the entropy gain comes from the release of bound water into  
554 the bulk [70] due to overlapping of the hydration shell of tau upon CC. In the literature, the  
555 entropy gain of counter ion release [76–79] or compressibility effects [80,81] have been  
556 proposed as origins for the LCST behavior, and as prevalent driving forces for CC [82]. While  
557 this study cannot entirely delineate between these possible contributions that are all subsumed  
558 into the Flory-Huggins  $\chi$  parameter or the excluded volume parameter in FTS, we demonstrate  
559 that it is not necessary to invoke a specific mechanism, such as counter ion release—the most  
560 popular hypothesis, to rationalize LCST driven CC formation. In fact, we performed FTS studies  
561 with (and without) explicit excess ions (Figure 6C) observing LCST behavior simply by means  
562 of excluded volume and electrostatic considerations and not invoking any counter ion release  
563 mechanism to capture the phase diagram of the entropy driven tau-RNA CC. Instead, many



564 factors that globally modulate the excluded volume effects in the biological system of interest  
565 and that inevitably modulate the hydration water population, including the hydrophobic effect  
566 and crowding, may be considered.

567 We demonstrated here that tau-RNA CC can be modeled as a coarse-grained  
568 polyelectrolyte mixture using equilibrium theory, and revealed the associated driving factors and  
569 the different thermodynamic contributions to the phase diagram. However, this finding does not  
570 contradict the possibility that tau-RNA complex coacervation is followed by, or even can  
571 facilitate, amyloid fibrillization of tau. Comparing our study to previous reports in the literature  
572 [21–23,25,83,84], it is clear that tau in fibrils possess dramatically different properties than tau in  
573 CCs. In contrast to fibrils, tau-RNA CCs are reversible and tau remains conformationally  
574 dynamic – this is because CCs are formed with a stable tau variant, such as the WT derived tau  
575 studied here. However, once aggregation-promoting factors are introduced, not only can the  
576 thermodynamically stable phase of tau-RNA CC be driven out of equilibrium, but the dense CC  
577 phase harboring high tau and RNA concentration may also lower the activation barrier for, and  
578 thus facilitate, tau aggregation. Still, tau complex coacervation is a distinct state and fibrilization  
579 is a distinct process, where the equilibrium of one does not contradict with its kinetic  
580 transformation into the other. Recently, the possibility of the transformation of tau CCs into tau  
581 fibrils has been demonstrated [21]. We have independently investigated these questions and find  
582 that irreversible transformation can be triggered by doping tau-RNA CC with highly sulfated  
583 polysaccharide heparin (Fig. S12). Tau is first driven towards an equilibrium complex coacervate  
584 state, from which tau can either re-dissolve into solution state reversibly, or form amyloid fibrils  
585 when aggregation driving force is present. However, the mechanism by which the CC state of tau

586 influences the rate of aggregation and/or alters the aggregation propensity of tau is not  
587 understood, and will and should be the subject of future studies.

588         The physiological role of tau-RNA CC as a possible regulatory mechanism or as an  
589 intermediate toward fibrilization is an ongoing topic of research. In either case, for tau-RNA CC  
590 to be relevant for cellular function LLPS would have to be possible near (certain) physiological  
591 conditions. Our *in vitro* experiments found the tau-RNA CC phase diagram boundary to lie near  
592 physiological conditions. This suggests that tau-RNA CC can occur *in vivo* upon modulation of  
593 parameters, such as the local temperature, electrostatic balance, including local pH, and osmotic  
594 pressure. We demonstrate that indeed tau-RNA CC can be achieved in co-culture with living  
595 cells. While the coexistence of tau and RNA at low (10  $\mu$ M) polymer concentrations is not  
596 sufficient to drive CC in cellular media, the addition of a molecular crowding reagent is, under  
597 physiological conditions (Fig 7). While in this study crowding has been simulated with PEG,  
598 many cellular proteins can act as molecular crowding reagents. This data encourages us to  
599 speculate that mechanisms that increase the already high concentrations of free proteins and  
600 other macromolecular constituents, *not* participating in CC, beyond the normal level within the  
601 cell (estimates of 50-200 mg/mL [85]) could be sufficient to promote tau-RNA CC by exerting  
602 crowding pressure. Thus, biological mechanisms that increase the concentration of intrinsically  
603 disordered and charged proteins and nucleic acids may be potent factors that drive liquid-liquid  
604 phase separation in the cellular context. Specifically for the context of this study, high  
605 concentrations of tau-RNA are by themselves sufficient to drive CC formation (Fig 7). Given  
606 that tau is known to bind and localize to microtubules in the axons of neurons, it is not a stretch  
607 to envision a scenario where the local concentration of tau would be highly elevated under  
608 certain stress conditions, around regions like the axon initial segment. We proposed at these

609 places in neuron, tau-RNA CCs have a higher probability to be observed. However, even though  
610 our calculations and experimental data support a model where tau-RNA CC *in vivo* is possible,  
611 whether this actually occurs within the cell depends on many other factors, among them the  
612 strength of tau-microtubule binding that compete with tau-RNA CC.

613

## 614 **Conclusion**

615 We report here the first detailed picture of the thermodynamics of tau/RNA complex  
616 coacervation. The observation of an LCST phase diagram implies that although electrostatic  
617 interactions are key to CC formation, factors that contribute to solvation entropy gain are key to  
618 driving liquid-liquid phase separation. We have computed the first approximation-free  
619 theoretical phase diagram for tau/RNA complex coacervation from FTS, where we introduced a  
620 temperature-dependent excluded volume term. Simulations show a competition between  
621 electrostatic strength (parameterized by the salt concentration) and excluded volume  
622 (parameterized by the solvent quality). This knowledge can be used to design experiments that  
623 perturb this parameter space *in vivo*, as well as predict or understand biological mechanisms that  
624 may be favorable towards liquid-liquid phase separation. As a proof of this concept we have  
625 shown that by deliberately changing salt concentration, temperature, and solvent quality (by the  
626 addition of PEG), we can make tau/RNA LLPS appear or disappear in cellular medium with *live*  
627 cells. Interestingly, we find that without any adjustable parameters our simulations predict that  
628 tau/RNA is positioned near the binodal phase boundary around physiological conditions. This  
629 suggests that small and subtle changes within the cellular environment may be sufficient to  
630 induce LLPS in otherwise healthy neurons. Even if the conditions that induce LLPS in the cell is  
631 transient, the LLPS state can facilitate irreversible protein aggregation if aggregation-promoting

632 factors are already available, giving credence to the idea that LLPS may play a role in  
633 neurodegenerative diseases. However, we speculate that LLPS is reversible in the majority of  
634 biological events that drive LLPS, making it hard to observe this state within the cellular context.

635

## 636 **Acknowledgement**

637 We acknowledge insightful and sustained discussions with Dr. Xumei Zhang on LLPS of tau  
638 under cellular conditions. JM would like to thank Scott P.O. Danielsen for helpful discussions  
639 regarding FTS. The authors acknowledge the National Institutes of Health (NIH)  
640 <http://www.nih.gov> (grant number R01AG05605) received by SH and KSK and the Tau  
641 consortium <http://www.tauconsortium.org> received by KSK and SH. The funder had no role in  
642 study design, data collection and analysis, decision to publish, or preparation of the manuscript.  
643 JS acknowledges support from the NSF (MCB-1716956). We acknowledge support from the  
644 Center for Scientific Computing from the CNSI, MRL: an NSF MRSEC (DMR-1720256). This  
645 work was partially supported by the MRSEC Program of the National Science Foundation under  
646 Award No. DMR 1720256.

647

648

## 649 REFERENCE

- 650 [1] Burke KA, Janke AM, Rhine CL, Fawzi NL. Residue-by-Residue View of In Vitro FUS  
651 Granules that Bind the C-Terminal Domain of RNA Polymerase II. *Mol Cell*. 2015 Oct  
652 15;60(2):231–41.
- 653 [2] Brady JP, Farber PJ, Sekhar A, Lin Y-H, Huang R, Bah A, et al. Structural and  
654 hydrodynamic properties of an intrinsically disordered region of a germ cell-specific  
655 protein on phase separation. *Proc Natl Acad Sci*. 2017 Sep 26;114(39):E8194–203.
- 656 [3] Anderson P, Kedersha N. RNA granules. *J Cell Biol*. 2006 Mar 13;172(6):803–8.
- 657 [4] Brangwynne CP, Eckmann CR, Courson DS, Rybarska A, Hoege C, Gharakhani J, et al.  
658 Germline P granules are liquid droplets that localize by controlled  
659 dissolution/condensation. *Science*. 2009 Jun 26;324(5935):1729–32.
- 660 [5] Wippich F, Bodenmiller B, Trajkovska MG, Wanka S, Aebersold R, Pelkmans L. Dual  
661 specificity kinase DYRK3 couples stress granule condensation/dissolution to mTORC1  
662 signaling. *Cell*. 2013 Feb 14;152(4):791–805.
- 663 [6] Veis A, Aranyi C. Phase separation in polyelectrolyte systems. I. Complex coacervates of  
664 gelatin. *J Phys Chem*. 1960;64(9):1203–1210.
- 665 [7] Arneodo C, Baszkin A, Benoit J, Thies C. Interfacial-Tension Behavior of Citrus Oils  
666 Against Phases Formed by Complex Coacervation of Gelatin. *Acs Symp Ser*.  
667 1988;370:132–47.
- 668 [8] Water JJ, Schack MM, Velazquez-Campoy A, Maltesen MJ, van de Weert M, Jorgensen  
669 L. Complex coacervates of hyaluronic acid and lysozyme: Effect on protein structure and  
670 physical stability. *Eur J Pharm Biopharm*. 2014 Oct;88(2):325–31.
- 671 [9] Molliex A, Temirov J, Lee J, Coughlin M, Kanagaraj AP, Kim HJ, et al. Phase Separation  
672 by Low Complexity Domains Promotes Stress Granule Assembly and Drives Pathological  
673 Fibrillization. *Cell*. 2015 Sep;163(1):123–33.
- 674 [10] Hyman AA, Weber CA, Jülicher F. Liquid-Liquid Phase Separation in Biology. *Annu Rev*  
675 *Cell Dev Biol*. 2014;30(1):39–58.
- 676 [11] Uversky VN, Kuznetsova IM, Turoverov KK, Zaslavsky B. Intrinsically disordered  
677 proteins as crucial constituents of cellular aqueous two phase systems and coacervates.  
678 *FEBS Lett*. 2015 Jan 2;589(1):15–22.
- 679 [12] Li YR, King OD, Shorter J, Gitler AD. Stress granules as crucibles of ALS pathogenesis. *J*  
680 *Cell Biol*. 2013 Apr 29;201(3):361–72.
- 681 [13] Murakami T, Qamar S, Lin JQ, Schierle GSK, Rees E, Miyashita A, et al. ALS/FTD  
682 Mutation-Induced Phase Transition of FUS Liquid Droplets and Reversible Hydrogels into

- 683 Irreversible Hydrogels Impairs RNP Granule Function. *Neuron*. 2015 Nov 18;88(4):678–  
684 90.
- 685 [14] Patel A, Lee HO, Jawerth L, Maharana S, Jahnel M, Hein MY, et al. A Liquid-to-Solid  
686 Phase Transition of the ALS Protein FUS Accelerated by Disease Mutation. *Cell*. 2015  
687 Aug 27;162(5):1066–77.
- 688 [15] Kato M, Han TW, Xie S, Shi K, Du X, Wu LC, et al. Cell-free formation of RNA  
689 granules: low complexity sequence domains form dynamic fibers within hydrogels. *Cell*.  
690 2012 May 11;149(4):753–67.
- 691 [16] Li H-R, Chiang W-C, Chou P-C, Wang W-J, Huang J. TAR DNA-binding protein 43  
692 (TDP-43) liquid-liquid phase separation is mediated by just a few aromatic residues. *J Biol*  
693 *Chem*. 2018 Mar 6;jbc.AC117.001037.
- 694 [17] Kwon I, Xiang S, Kato M, Wu L, Theodoropoulos P, Wang T, et al. Poly-dipeptides  
695 encoded by the C9orf72 repeats bind nucleoli, impede RNA biogenesis, and kill cells.  
696 *Science*. 2014 Sep 5;345(6201):1139–45.
- 697 [18] Lee K-H, Zhang P, Kim HJ, Mitrea DM, Sarkar M, Freibaum BD, et al. C9orf72  
698 Dipeptide Repeats Impair the Assembly, Dynamics, and Function of Membrane-Less  
699 Organelles. *Cell*. 2016 Oct 20;167(3):774-788.e17.
- 700 [19] Boeynaems S, Bogaert E, Kovacs D, Konijnenberg A, Timmerman E, Volkov A, et al.  
701 Phase Separation of C9orf72 Dipeptide Repeats Perturbs Stress Granule Dynamics. *Mol*  
702 *Cell*. 2017 Mar 16;65(6):1044-1055.e5.
- 703 [20] Nott TJ, Petsalaki E, Farber P, Jervis D, Fussner E, Plochowietz A, et al. Phase Transition  
704 of a Disordered Nuage Protein Generates Environmentally Responsive Membraneless  
705 Organelles. *Mol Cell*. 2015 Mar 5;57(5):936–47.
- 706 [21] Ambadipudi S, Biernat J, Riedel D, Mandelkow E, Zweckstetter M. Liquid–liquid phase  
707 separation of the microtubule-binding repeats of the Alzheimer-related protein Tau. *Nat*  
708 *Commun*. 2017 Aug 17;8(1):275.
- 709 [22] Zhang X, Lin Y, Eschmann NA, Zhou H, Rauch JN, Hernandez I, et al. RNA stores tau  
710 reversibly in complex coacervates. *PLOS Biol*. 2017 Jul 6;15(7):e2002183.
- 711 [23] Hernández-Vega A, Braun M, Scharrel L, Jahnel M, Wegmann S, Hyman BT, et al. Local  
712 Nucleation of Microtubule Bundles through Tubulin Concentration into a Condensed Tau  
713 Phase. *Cell Rep*. 2017 Sep 5;20(10):2304–12.
- 714 [24] Ferreón JC, Jain A, Choi K-J, Tsoi PS, MacKenzie KR, Jung SY, et al. Acetylation  
715 Disfavors Tau Phase Separation. *Int J Mol Sci*. 2018 May 4;19(5).
- 716 [25] Wegmann S, Eftekharzadeh B, Tepper K, Zoltowska KM, Bennett RE, Dujardin S, et al.  
717 Tau protein liquid-liquid phase separation can initiate tau aggregation. *EMBO J*. 2018 Apr  
718 3;37(7).

- 719 [26] Bungenberg de Jong H. Crystallisation–coacervation–flocculation. *Colloid Sci.*  
720 1949;2:232–58.
- 721 [27] Sing CE. Development of the modern theory of polymeric complex coacervation. *Adv*  
722 *Colloid Interface Sci.* 2017 Jan;239:2–16.
- 723 [28] Flory PJ. Principles of Polymer Chemistry [Internet]. 1953 [cited 2018 Jun 21]. Available  
724 from: <http://archive.org/details/FloryF.1953PrinciplesOfPolymerChemistry>
- 725 [29] Spruijt E, Westphal AH, Borst JW, Cohen Stuart MA, van der Gucht J. Binodal  
726 Compositions of Polyelectrolyte Complexes. *Macromolecules.* 2010 Aug 10;43(15):6476–  
727 84.
- 728 [30] Overbeek JTG, Voorn MJ. Phase separation in polyelectrolyte solutions. Theory of  
729 complex coacervation. *J Cell Comp Physiol.* 1957 May 1;49(S1):7–26.
- 730 [31] Tainaka K. Study of Complex Coacervation in Low Concentration by Virial Expansion  
731 Method. I. Salt Free Systems. *J Phys Soc Jpn.* 1979 Jun 15;46(6):1899–906.
- 732 [32] Veis A. PHASE SEPARATION IN POLYELECTROLYTE SYSTEMS. III. EFFECT OF  
733 AGGREGATION AND MOLECULAR WEIGHT HETEROGENEITY. *J Phys Chem.*  
734 1963 Oct 1;67(10):1960–4.
- 735 [33] Tainaka K-I. Effect of counterions on complex coacervation. *Biopolymers.* 1980 Jul  
736 1;19(7):1289–98.
- 737 [34] Nakajima A, Sato H. Phase relationships of an equivalent mixture of sulfated polyvinyl  
738 alcohol and aminoacetylated polyvinyl alcohol in microsalt aqueous solution.  
739 *Biopolymers.* 11(7):1345–55.
- 740 [35] Borue VY, Erukhimovich IY. A statistical theory of weakly charged polyelectrolytes:  
741 fluctuations, equation of state and microphase separation. *Macromolecules.* 1988 Nov  
742 1;21(11):3240–9.
- 743 [36] Borue VY, Erukhimovich IY. A statistical theory of globular polyelectrolyte complexes.  
744 *Macromolecules.* 1990 Jul 1;23(15):3625–32.
- 745 [37] Castelnovo M, Joanny J-F. Complexation between oppositely charged polyelectrolytes:  
746 Beyond the Random Phase Approximation. *Eur Phys J E.* 2001 Dec 1;6(1):377–86.
- 747 [38] Biesheuvel PM, Cohen Stuart MA. Electrostatic Free Energy of Weakly Charged  
748 Macromolecules in Solution and Intermacromolecular Complexes Consisting of  
749 Oppositely Charged Polymers. *Langmuir.* 2004 Mar 1;20(7):2785–91.
- 750 [39] Biesheuvel PM, Cohen Stuart MA. Cylindrical Cell Model for the Electrostatic Free  
751 Energy of Polyelectrolyte Complexes. *Langmuir.* 2004 May 1;20(11):4764–70.

- 752 [40] Lytle TK, Sing CE. Transfer matrix theory of polymer complex coacervation. *Soft Matter*.  
753 2017 Oct 11;13(39):7001–12.
- 754 [41] Shen K, Wang Z-G. Polyelectrolyte Chain Structure and Solution Phase Behavior.  
755 *Macromolecules*. 2018 Mar 13;51(5):1706–17.
- 756 [42] Shen K, Wang Z-G. Electrostatic correlations and the polyelectrolyte self energy. *J Chem*  
757 *Phys*. 2017 Feb 23;146(8):084901.
- 758 [43] Chollakup R, Smitthipong W, Eisenbach CD, Tirrell M. Phase Behavior and Coacervation  
759 of Aqueous Poly(acrylic acid)–Poly(allylamine) Solutions. *Macromolecules*. 2010 Mar  
760 9;43(5):2518–28.
- 761 [44] Zalusky AS, Olayo-Valles R, Wolf JH, Hillmyer MA. Ordered Nanoporous Polymers  
762 from Polystyrene–Polylactide Block Copolymers. *J Am Chem Soc*. 2002 Oct  
763 1;124(43):12761–73.
- 764 [45] Li L, Srivastava S, Andreev M, Marciel AB, de Pablo JJ, Tirrell MV. Phase Behavior and  
765 Salt Partitioning in Polyelectrolyte Complex Coacervates. *Macromolecules*. 2018 Apr  
766 24;51(8):2988–95.
- 767 [46] de la Cruz MO, Belloni L, Delsanti M, Dalbiez JP, Spalla O, Drifford M. Precipitation of  
768 highly charged polyelectrolyte solutions in the presence of multivalent salts. *J Chem Phys*.  
769 1995 Oct 1;103(13):5781–91.
- 770 [47] Banjade S, Rosen MK. Phase transitions of multivalent proteins can promote clustering of  
771 membrane receptors. *eLife*. 2014 Oct 16;3:e04123.
- 772 [48] Banjade S, Wu Q, Mittal A, Peeples WB, Pappu RV, Rosen MK. Conserved interdomain  
773 linker promotes phase separation of the multivalent adaptor protein Nck. *Proc Natl Acad*  
774 *Sci*. 2015 Nov 24;112(47):E6426–35.
- 775 [49] Qin J, de Pablo JJ. Criticality and Connectivity in Macromolecular Charge Complexation.  
776 *Macromolecules*. 2016 Nov 22;49(22):8789–800.
- 777 [50] Kudlay A, Olvera de la Cruz M. Precipitation of oppositely charged polyelectrolytes in  
778 salt solutions. *J Chem Phys*. 2003 Dec 23;120(1):404–12.
- 779 [51] Kudlay A, Ermoshkin AV, Olvera de la Cruz M. Complexation of Oppositely Charged  
780 Polyelectrolytes: Effect of Ion Pair Formation. *Macromolecules*. 2004 Nov  
781 1;37(24):9231–41.
- 782 [52] Castelnovo M, Joanny J-F. Formation of Polyelectrolyte Multilayers. *Langmuir*. 2000 Sep  
783 1;16(19):7524–32.
- 784 [53] Lin Y-H, Song J, Forman-Kay JD, Chan HS. Random-phase-approximation theory for  
785 sequence-dependent, biologically functional liquid-liquid phase separation of intrinsically  
786 disordered proteins. *J Mol Liq*. 2017 Feb 1;228:176–93.



- 787 [54] Lin Y-H, Forman-Kay JD, Chan HS. Sequence-Specific Polyampholyte Phase Separation  
788 in Membraneless Organelles. *Phys Rev Lett*. 2016 Oct 17;117(17):178101.
- 789 [55] Delaney KT, Fredrickson GH. Theory of polyelectrolyte complexation—Complex  
790 coacervates are self-coacervates. *J Chem Phys*. 2017 Jun 14;146(22):224902.
- 791 [56] Das S, Eisen A, Lin Y-H, Chan HS. A Lattice Model of Charge-Pattern-Dependent  
792 Polyampholyte Phase Separation. *J Phys Chem B*. 2018 May 31;122(21):5418–31.
- 793 [57] Peterson DW, Zhou H, Dahlquist FW, Lew J. A soluble oligomer of tau associated with  
794 fiber formation analyzed by NMR. *Biochemistry*. 2008 Jul 15;47(28):7393–404.
- 795 [58] Gustke N, Trinczek B, Biernat J, Mandelkow E-M, Mandelkow E. Domains of tau Protein  
796 and Interactions with Microtubules. *Biochemistry*. 1994 Oct 16;33(32):9511–22.
- 797 [59] Siow KS, Delmas G, Patterson D. Cloud-point curves in polymer solutions with adjacent  
798 upper and lower critical solution temperatures. *Macromolecules*. 1972;5(1):29–34.
- 799 [60] Berry J, Weber SC, Vaidya N, Haataja M, Brangwynne CP. RNA transcription modulates  
800 phase transition-driven nuclear body assembly. *Proc Natl Acad Sci*. 2015 Sep  
801 22;112(38):E5237–45.
- 802 [61] Brangwynne CP, Tompa P, Pappu RV. Polymer physics of intracellular phase transitions.  
803 *Nat Phys*. 2015 Nov;11(11):899–904.
- 804 [62] Doi M, Edwards SF. *The Theory of Polymer Dynamics*. Clarendon Press; 1988. 420 p.
- 805 [63] Stockmayer WH. Chain dimensions near the flory temperature. *J Polym Sci*. 15(80):595–  
806 8.
- 807 [64] Rubinstein M, Colby RH. *Polymer Physics*. OUP Oxford; 2003. 458 p.
- 808 [65] Suzuki H, Ohno K, Inagaki H. An estimation of the temperature dependence of the  
809 excluded-volume integral. *Eur Polym J*. 1982 Jan 1;18(3):247–55.
- 810 [66] Bianconi A, Ciasca G, Tenenbaum A, Battisti A, Campi G. Temperature and solvent  
811 dependence of the dynamical landscape of tau protein conformations. *J Biol Phys*. 2012  
812 Jan 1;38(1):169–79.
- 813 [67] Danielsen SPO, McCarty J, Shea J-E, Delaney KT, Fredrickson GH. Small Ion Effects on  
814 Self-Coacervation Phenomena in Block Polyampholytes. *Manuscr Prep*. 2018;
- 815 [68] Gennes P-G de, Gennes PP-G. *Scaling Concepts in Polymer Physics*. Cornell University  
816 Press; 1979. 336 p.
- 817 [69] Silverstein KAT, Haymet ADJ, Dill KA. The Strength of Hydrogen Bonds in Liquid  
818 Water and Around Nonpolar Solutes. *J Am Chem Soc*. 2000 Aug 23;122(33):8037–41.

- 819 [70] Makhatadze GI, Privalov PL. Contribution of Hydration to Protein Folding  
820 Thermodynamics: I. The Enthalpy of Hydration. *J Mol Biol.* 1993 Jul 20;232(2):639–59.
- 821 [71] Matubayasi N. Free-energy analysis of protein solvation with all-atom molecular  
822 dynamics simulation combined with a theory of solutions. *Curr Opin Struct Biol.* 2017  
823 Apr 1;43:45–54.
- 824 [72] Thirumalai D, Reddy G, Straub JE. Role of Water in Protein Aggregation and Amyloid  
825 Polymorphism. *Acc Chem Res.* 2012 Jan 17;45(1):83–92.
- 826 [73] Feil H, Bae YH, Feijen J, Kim SW. Effect of comonomer hydrophilicity and ionization on  
827 the lower critical solution temperature of N-isopropylacrylamide copolymers.  
828 *Macromolecules.* 1993 May;26(10):2496–500.
- 829 [74] Choi E, Yethiraj A. Entropic Mechanism for the Lower Critical Solution Temperature of  
830 Poly(ethylene oxide) in a Room Temperature Ionic Liquid. *ACS Macro Lett.* 2015 Jul  
831 21;4(7):799–803.
- 832 [75] Martin EW, Mittag T. Relationship of Sequence and Phase Separation in Protein Low-  
833 Complexity Regions. *Biochemistry.* 2018 01;57(17):2478–87.
- 834 [76] Dobrynin AV, Rubinstein M. Counterion Condensation and Phase Separation in Solutions  
835 of Hydrophobic Polyelectrolytes. *Macromolecules.* 2001 Mar 1;34(6):1964–72.
- 836 [77] Gummel J, Cousin F, Boué F. Counterions Release from Electrostatic Complexes of  
837 Polyelectrolytes and Proteins of Opposite Charge: A Direct Measurement. *J Am Chem  
838 Soc.* 2007 May 1;129(18):5806–7.
- 839 [78] Muthukumar M. Theory of counter-ion condensation on flexible polyelectrolytes:  
840 Adsorption mechanism. *J Chem Phys.* 2004 Apr 29;120(19):9343–50.
- 841 [79] Hone JHE, Howe AM, Cosgrove T. A Small-Angle Neutron Scattering Study of the  
842 Structure of Gelatin/Polyelectrolyte Complexes. *Macromolecules.* 2000 Feb  
843 1;33(4):1206–12.
- 844 [80] Lacombe RH, Sanchez IC. Statistical thermodynamics of fluid mixtures. *J Phys Chem.*  
845 1976 Nov 1;80(23):2568–80.
- 846 [81] Sanchez IC, Lacombe RH. Statistical Thermodynamics of Polymer Solutions.  
847 *Macromolecules.* 1978 Nov 1;11(6):1145–56.
- 848 [82] Chang L-W, Lytle TK, Radhakrishna M, Madinya JJ, Vélez J, Sing CE, et al. Sequence  
849 and entropy-based control of complex coacervates. *Nat Commun.* 2017 Nov 2;8(1):1273.
- 850 [83] Eschmann NA, Georgieva ER, Ganguly P, Borbat PP, Rappaport MD, Akdogan Y, et al.  
851 Signature of an aggregation-prone conformation of tau. *Sci Rep.* 2017 Mar 17;7:44739.

- 852 [84] Pavlova A, Cheng C-Y, Kinnebrew M, Lew J, Dahlquist FW, Han S. Protein structural  
853 and surface water rearrangement constitute major events in the earliest aggregation stages  
854 of tau. *Proc Natl Acad Sci.* 2016;113(2):E127–E136.
- 855 [85] Finka A, Goloubinoff P. Proteomic data from human cell cultures refine mechanisms of  
856 chaperone-mediated protein homeostasis. *Cell Stress Chaperones.* 2013 Sep;18(5):591–  
857 605.
- 858
- 859

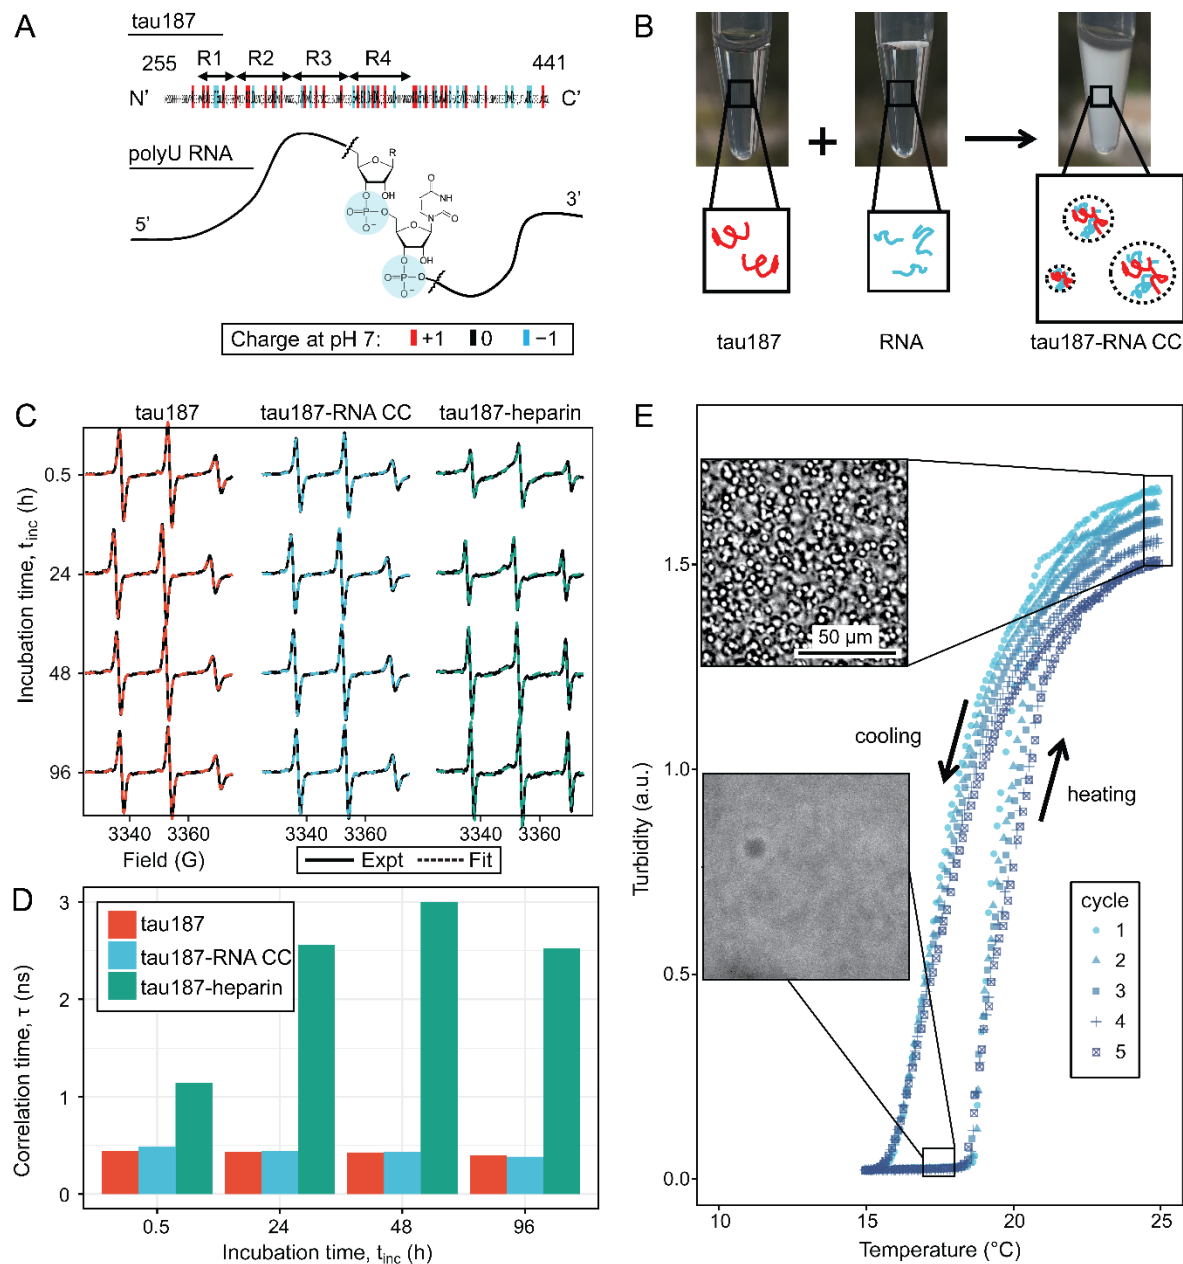

**FIG. 1 Steady tau dynamics and reversible droplet formation of tau-RNA complex coacervates.** **A.** Diagram of tau187 (tau) and polyU RNA (RNA). Tau187 is a truncated version of full-length human tau (2N4R 255-441) containing repeat domains and C terminal. At neutral pH experimental conditions, tau187 is overall positively charged; while RNA consists of a phosphate backbone and is negatively charged. **B.** Scheme of tau-RNA CC preparation. Mixing clear tau187 and RNA solutions at proper conditions results in a turbid solution containing liquid

droplets. **C.** X-band cw-EPR spectra (solid line) of tau187 solution (tau187, red), tau187-RNA CC (blue) and tau187-heparin (green) at room temperature with different incubation time,  $t_{inc}$ . Samples contains 500  $\mu$ M tau with 20% spin-labelled. EPR simulation were performed (SI Method) and the fitted spectra is shown as a dashed line. **D.** Rotational correlation time,  $\tau_R$  extracted from EPR simulation shown in (b1) (SI Method). **E.** Turbidity of tau187-RNA suspension in consecutive heating-cooling cycles. Confocal images represented samples at 19 °C and 25 °C. Temperatures were ramped at 1 °C/min.

FIGURE 2

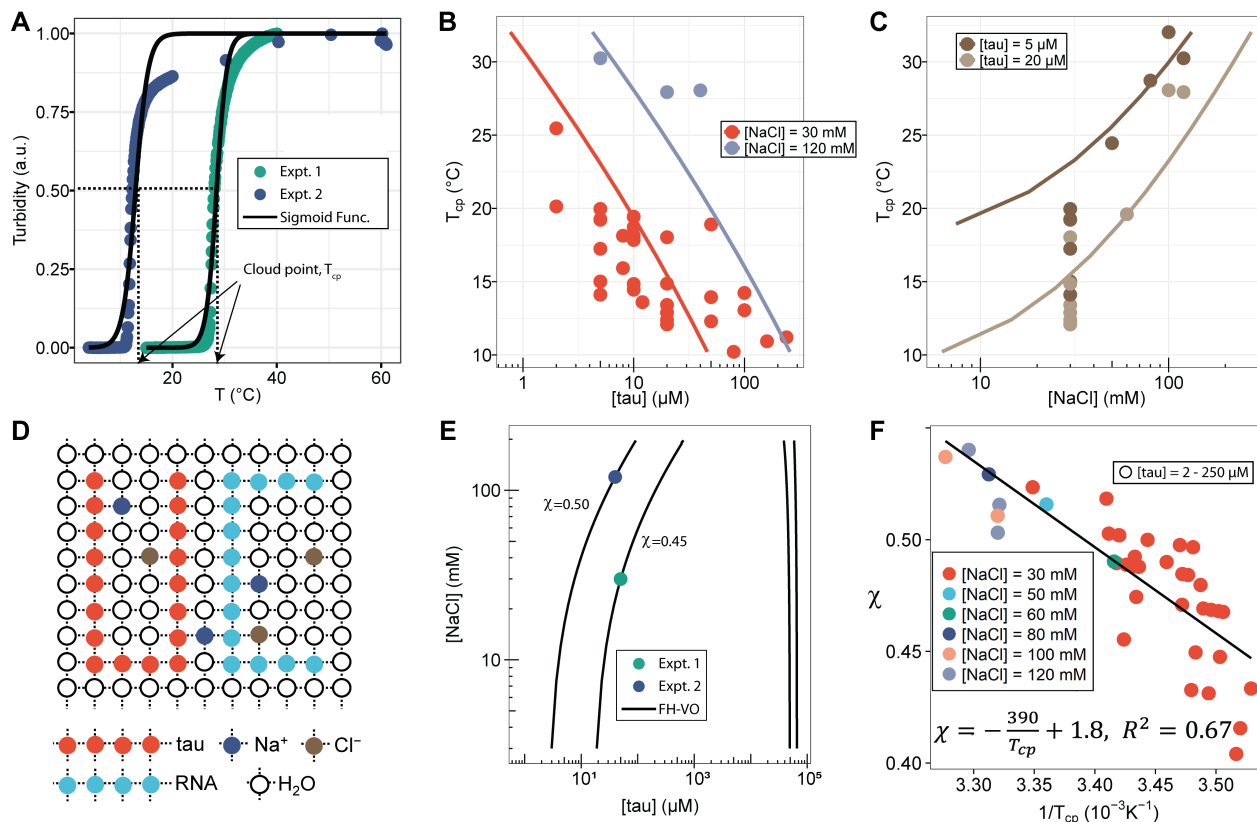

**FIG. 2 FH-VO modeling of tau-RNA CC.** **A.** Turbidity of tau187-RNA CC upon heating (Expt.1 ([tau], [NaCl]) = (50 μM, 120 mM), green dots; Expt.2 ([tau], [NaCl]) = (40 μM, 30 mM), purple dots). Absorbance at  $\lambda = 500$  nm were normalized and used as turbidity value. Turbidity-temperature data of the heating curves were fitted with a sigmoidal function (solid line) as described in (SI Method), and the temperature at which normalized turbidity reaches 0.5 was assigned to cloud point,  $T_{cp}$ . **B-C.** Experimental phase diagram (points) showing [tau] vs.  $T_{cp}$  and [NaCl] vs.  $T_{cp}$  along with the binodal curve generated from fitting the data to the FH-VO model with  $\chi = \chi(T_{cp})$  (solid line) **D.** Diagram of Flory Huggins lattice. Tau and RNA are represented by consecutively occupied lattice sites. **E.** Each experimental condition in (A) was

independently fit to the FH-VO model (solid lines) to obtain an empirical  $\chi$  value. **E** shows two representative curves. These empirically determined values of  $\chi$  are shown as points in **F**. The solid line in **F** is a linear regression, generating  $\chi = \chi(T_{cp})$ , which is then used to generate the binodal lines in **B** and **C**.

FIGURE 3

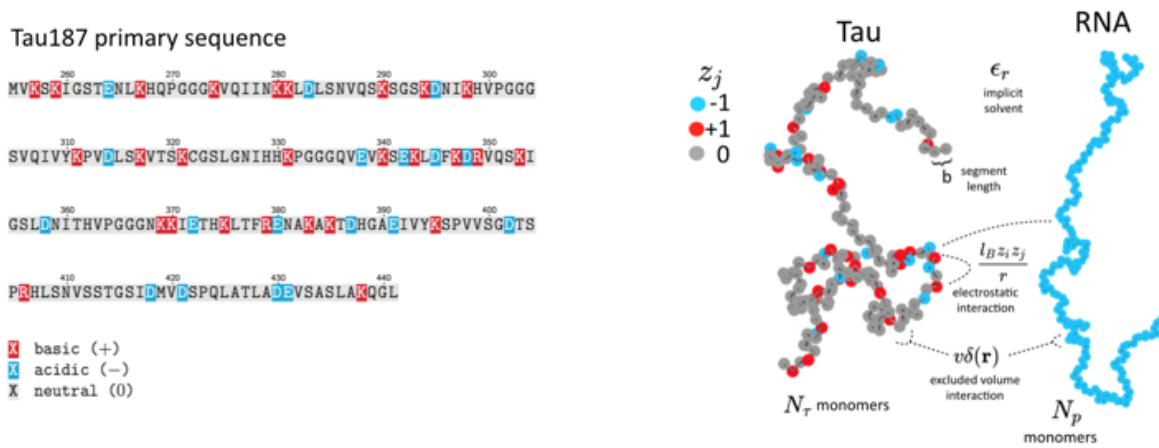

**FIG. 3 Schematic depiction of the polyelectrolyte model.** Tau and RNA molecules are represented as bead-spring polymers with segment length  $b$  in implicit solvent. Tau is modeled as a polyampholyte with the charge of each monomer determined from the amino acid charge at pH=7. RNA is modeled as a fully charged polyelectrolyte. In addition to chain connectivity, all monomers interact with an excluded volume repulsive potential, and charged monomers interact with a long-ranged Coulomb potential.



FIGURE

4

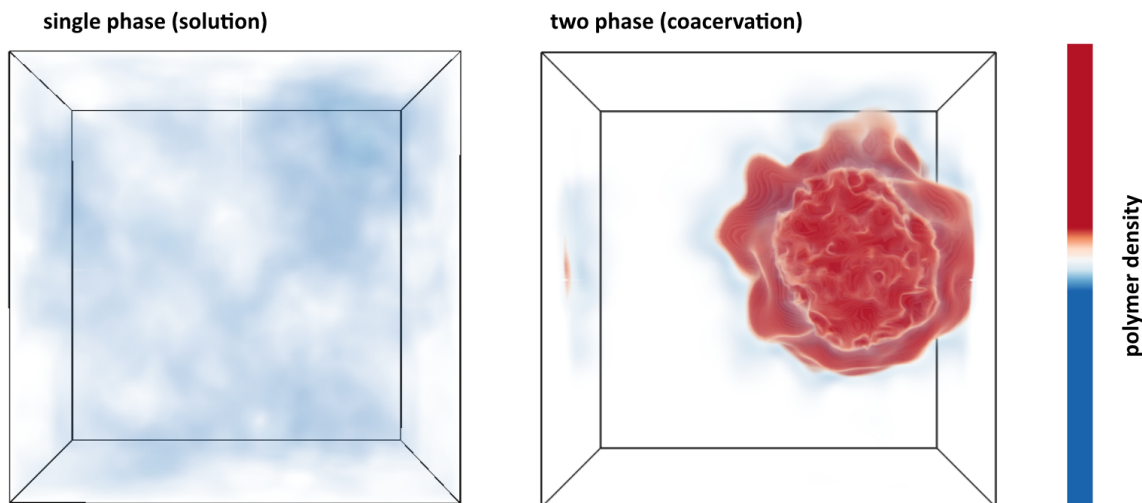

**FIG. 4 Polymer density field from FTS.** **Left:** Polymer density profile showing a single solution phase for the condition of relatively weak electrostatic strength  $l_B = 0.16 b$  and relatively high excluded volume (good solvent conditions)  $v = 0.02 b^3$ . The solution phase is characterized by near homogeneous low polymer density (white/light blue) throughout the entire simulation box. **Right:** Polymer density profile showing complex coacervation upon increasing the electrostatic strength to  $l_B = 3.25 b$  and decreasing the solvent quality by lowering the excluded volume to  $v = 0.0068 b^3$ . The two phase region is characterized by a distinct region of high polymer density (dark red) and a surrounding region of low polymer density (white) within the same simulation box. The total polymer concentration is the same in both simulations.

FIGURE 5

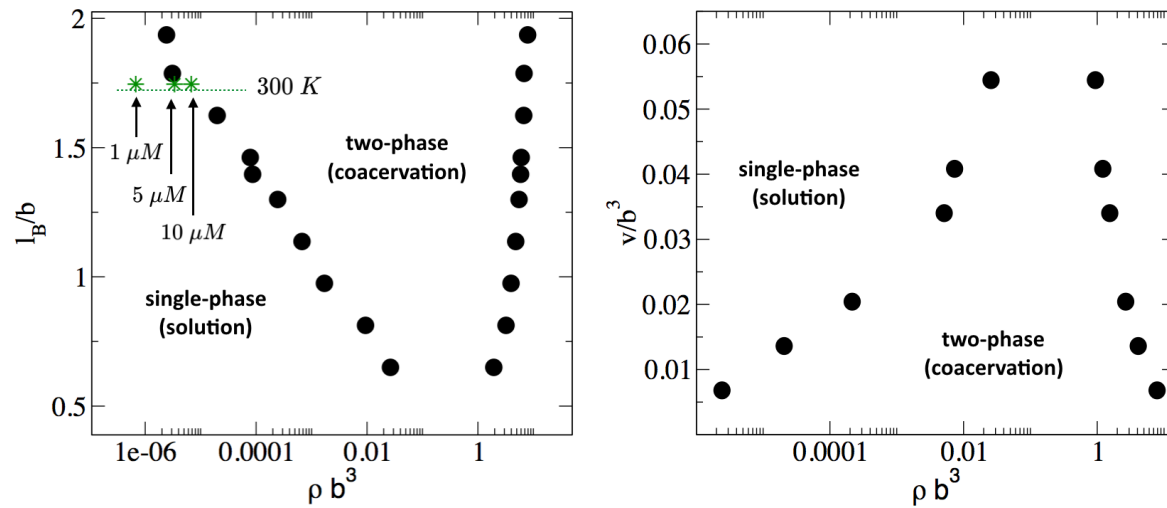

**FIG. 5 Phase diagram of the Tau/RNA model obtained from FTS. (Left)** Binodal points as a function of the Bjerrum length at fixed excluded volume of  $v = 0.0068 b^3$ . For comparison three concentrations at 300 K are indicated (arrows) assuming  $\epsilon_r = 80$  and  $b = 4 \text{ \AA}$  **(Right)** Binodal points as a function of the excluded volume at fixed Bjerrum length  $l_B = 1.79 b$

FIGURE 6

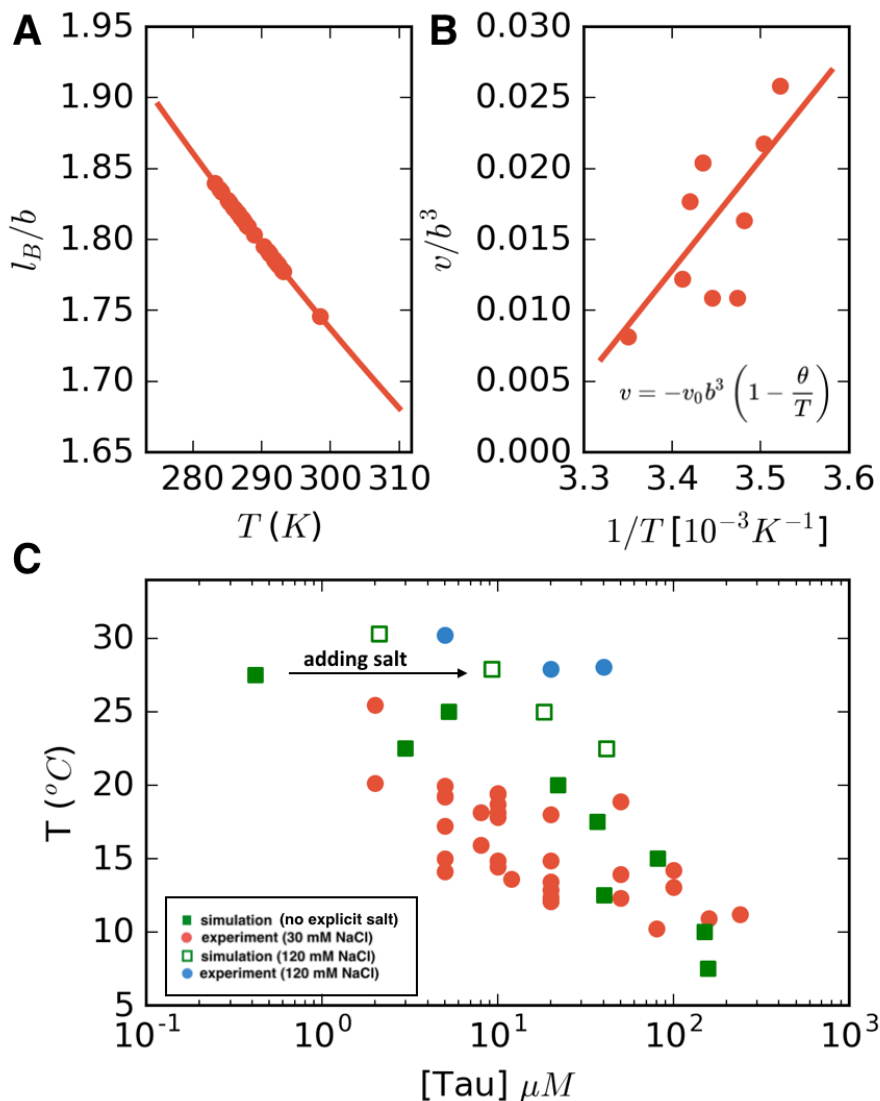

**FIG 6 LCST phase behavior from FTS:** (A) Temperature dependence of the reduced Bjerrum length ( $\epsilon=80$  for water) shown in red. (B) Temperature dependence of the excluded volume obtained by adjusting the excluded volume parameter until FTS agrees with a subset of the experimental data (points). The solid line shows a linear fit to the data which is used to obtain the temperature dependent excluded volume for subsequent simulations. (C) FTS coexistence points (filled green squares) obtained by using a temperature dependent Bjerrum length (Fig 6A) and excluded volume (Fig 6B). Experiments performed at 20 mM NaCl are shown in red for comparison. Upon introducing excess salt ions in FTS with a fixed

concentration of  $[\text{NaCl}] = 120 \text{ mM}$ , the binodal shifts upwards (open green squares). For comparison experiments performed at 120 mM NaCl are shown in blue.

FIGURE 7

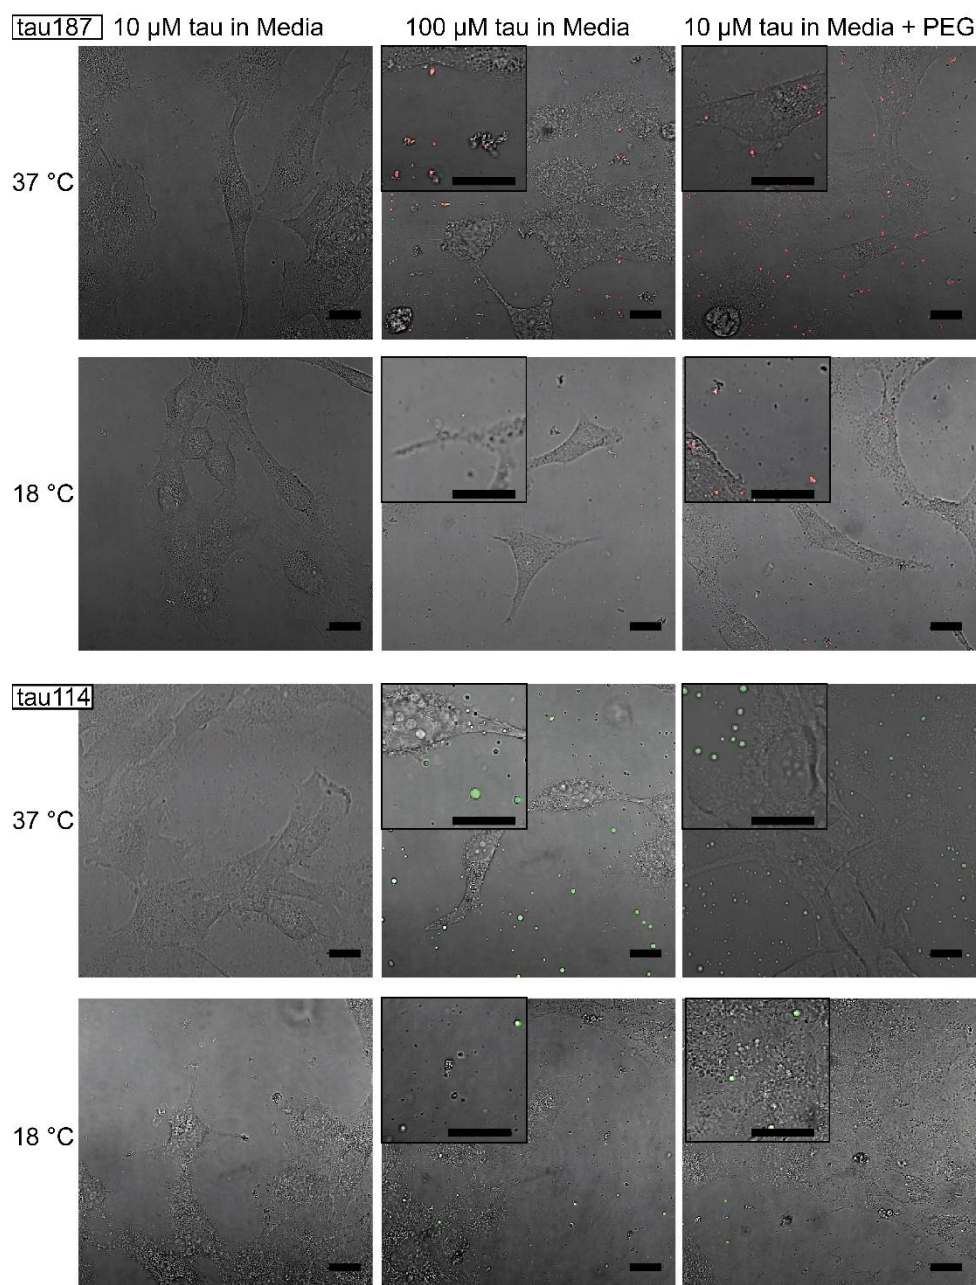

**FIG. 7 Tuning experimental conditions to catch tau-RNA complex cocervates in presence of living cells.** Bright field images and superimposing fluorescence images of tau-RNA CC coculturing with H4 cells, with 10  $\mu$ M tau (left), 100  $\mu$ M tau (middle) and 10  $\mu$ M tau with 10% v.v. PEG (right). Samples at 37 °C (first row) and 18 °C (second row) were images with

representative images showing the co-presence of living cells and tau-RNA CCs. Tau187 (Top) and tau114 (Bottom) was used showing tau114 with higher propensity at CC formation. Alexa Fluor 488 was used to prepare fluorescent labeled tau. 3  $\mu\text{g}/\text{mL}$  polyU RNA per 1  $\mu\text{M}$  tau was used to prepared samples. Scale bar is 20  $\mu\text{m}$ .
